# Supplementary material for: WideEffHunter: An Algorithm to Predict Canonical and Non-Canonical Effectors in Fungi and Oomycetes
Source: MDPI journal article supplement (doi:10.3390/ijms232113567), 2022-11-05
Supplement: s1 [file s1]

**Table S3.** Top15 MEME motifs found in the negative dataset

| MEME ID | Number of hits in the negative database | Width | E-value                 | Best possible match                                      |
|---------|-----------------------------------------|-------|-------------------------|----------------------------------------------------------|
| MEME-1  | 2148                                    | 21    | $5.3 \times 10^{-405}$  | VKPGEKTAIMGPNCGCKSTLL                                    |
| MEME-2  | 2165                                    | 21    | $5.9 \times 10^{-327}$  | NGRGLSGGQKQRVSIARALYS                                    |
| MEME-3  | 2137                                    | 29    | $2.0 \times 10^{-402}$  | PKILFLDEPTSGLDSETEWNIQRFLRKEF                            |
| MEME-4  | 579                                     | 50    | $2.3 \times 10^{-362}$  | YCPQTPWIQNM TIRDNILFGSPYDEEWYWQVIHACCLEPDLEML<br>PHGDQT  |
| MEME-5  | 938                                     | 39    | $1.10 \times 10^{-244}$ | FRFYEPTSGHITIDGHDISKIPRHDLRSRIGIVPQDPVL                  |
| MEME-6  | 1337                                    | 22    | $4.20 \times 10^{-210}$ | LCVPPGEMTVVVGPNCGCKSTL                                   |
| MEME-7  | 1690                                    | 21    | $6.60 \times 10^{-182}$ | FDKICVMDEGKVVEYGPHKEL                                    |
| MEME-8  | 643                                     | 41    | $2.50 \times 10^{-217}$ | ASKKLHQDLLRTVMHAPMRFFDTTPTGRIMNRFSDMDLID                 |
| MEME-9  | 841                                     | 21    | $1.10 \times 10^{-132}$ | GKNLSQGQRQLLCLARAMVRR                                    |
| MEME-10 | 885                                     | 29    | $7.00 \times 10^{-140}$ | RPDICCLDDPFSALDHHTERHIWDNCF CG                           |
| MEME-11 | 533                                     | 29    | $5.50 \times 10^{-131}$ | PGTVRSNLDPFHEHTDEECWDALRRVHLW                            |
| MEME-12 | 373                                     | 32    | $1.90 \times 10^{-108}$ | PDDHSFQRKTGYCEQEDVHLPTLTVRETLEFS                         |
| MEME-13 | 69                                      | 50    | $3.20 \times 10^{-100}$ | WWGRMKEAQDRQKAHMEATIRNNMKAGKKNNDDNKL RQAK<br>SRQKKLDDR W |
| MEME-14 | 580                                     | 21    | $2.60 \times 10^{-85}$  | KSPLYSHFGETLSGLTTIRAF                                    |
| MEME-15 | 851                                     | 15    | $1.80 \times 10^{-79}$  | RTIICIAHRLSTIMD                                          |

Negative dataset was taken from Carreón-Anguiano et al. (2020). It comprises 4528 protein sequences with different length, presence/absence of signal peptide and TMDs
