# Supplementary material for: WideEffHunter: An Algorithm to Predict Canonical and Non-Canonical Effectors in Fungi and Oomycetes
Source: MDPI journal article supplement (doi:10.3390/ijms232113567), 2022-11-05
Supplement: s1 [file s1]

**Table S5.1.** Regular expressions for effector motifs, obtained from several references

| Motif            | Regular expression                                                                                                                                                                                                                                                                                                                                                                                                                                                 | Reference                                                                                     |
|------------------|--------------------------------------------------------------------------------------------------------------------------------------------------------------------------------------------------------------------------------------------------------------------------------------------------------------------------------------------------------------------------------------------------------------------------------------------------------------------|-----------------------------------------------------------------------------------------------|
| RXLR             | ( <sup>^</sup> w{1,40}\w{1,96}[RKH]\w[LIMFYWK][RALQGTF])*[ED][ED][KR]                                                                                                                                                                                                                                                                                                                                                                                              | Huang et al., 2022; Zhao et al., 2020; Liu et al., 2019; Sonah et al., 2016                   |
| Crinkler         | ( <sup>^</sup> \w{10,40}\w{1,96}L[FYRL][LKF][ATVRK][KRN])                                                                                                                                                                                                                                                                                                                                                                                                          | Huang et al., 2022; Zhao et al., 2020; Liu et al., 2019                                       |
| [SG]PC[KR]P      | ( <sup>^</sup> \w{10,40}\w{1,96}[GS]PC[KR]P)                                                                                                                                                                                                                                                                                                                                                                                                                       | Huang et al., 2022; Sperschneider et al., 2013                                                |
| [WYF]CxTYxSTYL   | [WYF]C\wTY\wSTYL                                                                                                                                                                                                                                                                                                                                                                                                                                                   | Sperschneider et al., 2013                                                                    |
| YFWxC            | ( <sup>^</sup> \w{10,40}\w{1,30}[YFW]\wC)                                                                                                                                                                                                                                                                                                                                                                                                                          | Huang et al., 2022; Zhao et al., 2020; Liu et al., 2019; Xia et al., 2017; Sonah et al., 2016 |
| CFEM 2           | P\wC[AG]\w{2}C\w{8,12}C\w{1,3}[\w,T]D\w{2,5}C\wC\w{9,14}C\w{3,4}C\w{15,16}                                                                                                                                                                                                                                                                                                                                                                                         | Wang et al., 2022; Zhao et al., 2020; Liu et al., 2019                                        |
| LysM             | Y\w{4}G\w{2}[ACFGHIKLMRTVWY]                                                                                                                                                                                                                                                                                                                                                                                                                                       | Zhao et al., 2020; Liu et al., 2019                                                           |
| EAR 1            | L\wL\wL                                                                                                                                                                                                                                                                                                                                                                                                                                                            | Zhao et al., 2020; Liu et al., 2019                                                           |
| EAR 2            | DLN\w{2}P                                                                                                                                                                                                                                                                                                                                                                                                                                                          | Zhao et al., 2020; Liu et al., 2019                                                           |
| DPBB 1 (PNPi)    | T[ACDGNPSTV]ALS[ST]ALF[ACDGNPSTV]{2}G\w[ACDGNPSTV]CG[AGS]C[FHWWY][CDEHKNQRST][ILV][ACFGHIKLMRTVWY]C\w{3}[ACDEGHKNQRST][ACDGNPSTV]{2}[CDEHKNQRST][ACFGHIKLMRTVWY]C[ACFGHIKLMRTVWY][ACDGNPSTV]\w{2}[ACDGNPSTV]{2}[ILV][ACFGHIKLMRTVWY][ILV]TATN[ACFGHIKLMRTVWY]CPP[ACDGNPSTV]\w[ACDEGHKNQRST]\w[ACDGNPSTV]{3}\w{2}[ACDGNPSTV]WCNPP[CDEHKNQRST]{2}HFD[ACFGHIKLMRTVWY][AGS]\wP[ACFGHIKLMRTVWY][FHWWY]\w[CDEHKNQRST][ILV]A\w{2}[HKR]AG[ILV]VP[ILV][ACDEGHKNQRST][FHWWY] | Zhao et al., 2020;                                                                            |
| CHxC             | CH\wC                                                                                                                                                                                                                                                                                                                                                                                                                                                              | Huang et al., 2022;                                                                           |
| G[IFY][ALST]R    | G[IFY][ALST]R                                                                                                                                                                                                                                                                                                                                                                                                                                                      | Huang et al., 2022; Xia et al., 2017                                                          |
| [LI]xAR          | [LI]\wAR                                                                                                                                                                                                                                                                                                                                                                                                                                                           | Huang et al., 2022;                                                                           |
| [RK]VY[LI]R      | [RK]VY[LI]R                                                                                                                                                                                                                                                                                                                                                                                                                                                        | Huang et al., 2022;                                                                           |
| YxSL[RK]         | Y\wSL[RK]                                                                                                                                                                                                                                                                                                                                                                                                                                                          | Huang et al., 2022; Xia et al., 2017                                                          |
| ToxA             | RGD                                                                                                                                                                                                                                                                                                                                                                                                                                                                | Huang et al., 2022; Zhao et al., 2020; Liu et al., 2019                                       |
| PDI              | [KRHQSA][DENQ]EL                                                                                                                                                                                                                                                                                                                                                                                                                                                   | Sonah et al., 2016                                                                            |
| YxSL[RK]         | Y\wSL[RK]                                                                                                                                                                                                                                                                                                                                                                                                                                                          | Adhikari et al., 2013                                                                         |
| RSIVEQD          | RSIVEQD                                                                                                                                                                                                                                                                                                                                                                                                                                                            | Sonah et al., 2016                                                                            |
| [LI]xAR[SE][DSE] | [LI]\wAR[SE][DSE]                                                                                                                                                                                                                                                                                                                                                                                                                                                  | Xia et al., 2017                                                                              |
| [RK]CxCX{12}H    | [RK]C\w{2}C\w{12}H                                                                                                                                                                                                                                                                                                                                                                                                                                                 | Xia et al., 2017                                                                              |
